# Supplementary material
Source: PubMed Central journal article supplement (PMC7255511)
Supplement: PRO-29-1535-s002.pdf [file PRO-29-1535-s002.pdf]

| SNP         | Chromosome | Basepair  | final_maf | Gene  |
|-------------|------------|-----------|-----------|-------|
| rs10858022  | 1          | 114446341 | 0.367812  | AP4B1 |
| rs12076115  | 1          | 114437386 | 0.0161741 | AP4B1 |
| rs12079716  | 1          | 114444594 | 0.0185703 | AP4B1 |
| rs1217397   | 1          | 114447565 | 0.329473  | AP4B1 |
| rs1217398   | 1          | 114447776 | 0.224441  | AP4B1 |
| rs1217401   | 1          | 114438951 | 0.376997  | AP4B1 |
| rs1217402   | 1          | 114440258 | 0.237819  | AP4B1 |
| rs1310183   | 1          | 114439522 | 0.377995  | AP4B1 |
| rs150066260 | 1          | 114446488 | 0.0117812 | AP4B1 |
| rs17031980  | 1          | 114438123 | 0.0229633 | AP4B1 |
| rs17464525  | 1          | 114443899 | 0.122404  | AP4B1 |
| rs201156296 | 1          | 114437834 | 0.116613  | AP4B1 |
| rs34751342  | 1          | 114444444 | 0.0215655 | AP4B1 |
| rs376491508 | 1          | 114440214 | 0.0131789 | AP4B1 |
| rs3789613   | 1          | 114443035 | 0.365615  | AP4B1 |
| rs3838300   | 1          | 114442356 | 0.122204  | AP4B1 |
| rs41283516  | 1          | 114443343 | 0.0175719 | AP4B1 |
| rs6661817   | 1          | 114447034 | 0.36901   | AP4B1 |
| rs6695260   | 1          | 114439247 | 0.0107827 | AP4B1 |
| rs6703981   | 1          | 114439490 | 0.0141773 | AP4B1 |
| rs7513707   | 1          | 114445880 | 0.241214  | AP4B1 |
| rs7523862   | 1          | 114443419 | 0.365415  | AP4B1 |
| rs78665702  | 1          | 114442428 | 0.0105831 | AP4B1 |
| rs79496935  | 1          | 114442087 | 0.0141773 | AP4B1 |
| rs79561229  | 1          | 114438248 | 0.0133786 | AP4B1 |
| rs10152338  | 15         | 51226235  | 0.13119   | AP4E1 |
| rs10519288  | 15         | 51280263  | 0.0465256 | AP4E1 |
| rs10519289  | 15         | 51286576  | 0.183706  | AP4E1 |
| rs10566068  | 15         | 51290391  | 0.496206  | AP4E1 |
| rs10588492  | 15         | 51220912  | 0.278017  | AP4E1 |
| rs10744956  | 15         | 51269629  | 0.251198  | AP4E1 |
| rs11070822  | 15         | 51242782  | 0.192692  | AP4E1 |
| rs11070824  | 15         | 51249161  | 0.253395  | AP4E1 |
| rs11070825  | 15         | 51249529  | 0.141573  | AP4E1 |
| rs11070826  | 15         | 51258145  | 0.308706  | AP4E1 |
| rs111460275 | 15         | 51280931  | 0.0205671 | AP4E1 |
| rs112466086 | 15         | 51240920  | 0.0205671 | AP4E1 |
| rs112846901 | 15         | 51239390  | 0.0203674 | AP4E1 |
| rs112879726 | 15         | 51284089  | 0.0205671 | AP4E1 |
| rs11329556  | 15         | 51258750  | 0.429113  | AP4E1 |
| rs113350285 | 15         | 51271063  | 0.0133786 | AP4E1 |
| rs11353844  | 15         | 51225768  | 0.0151757 | AP4E1 |

|             |    |          |           |       |
|-------------|----|----------|-----------|-------|
| rs11378934  | 15 | 51219714 | 0.39996   | AP4E1 |
| rs114178510 | 15 | 51212177 | 0.047524  | AP4E1 |
| rs114255592 | 15 | 51220599 | 0.0145767 | AP4E1 |
| rs114529826 | 15 | 51218544 | 0.0241613 | AP4E1 |
| rs1147128   | 15 | 51207983 | 0.436701  | AP4E1 |
| rs1147129   | 15 | 51204364 | 0.440895  | AP4E1 |
| rs1147130   | 15 | 51202040 | 0.440895  | AP4E1 |
| rs114733950 | 15 | 51264419 | 0.0553115 | AP4E1 |
| rs115250045 | 15 | 51258086 | 0.0559105 | AP4E1 |
| rs115377547 | 15 | 51215691 | 0.0123802 | AP4E1 |
| rs115436087 | 15 | 51256171 | 0.0353434 | AP4E1 |
| rs115584492 | 15 | 51230023 | 0.0125799 | AP4E1 |
| rs115689615 | 15 | 51207997 | 0.0147764 | AP4E1 |
| rs116004259 | 15 | 51209693 | 0.0129792 | AP4E1 |
| rs116159461 | 15 | 51202535 | 0.014976  | AP4E1 |
| rs116226836 | 15 | 51262151 | 0.0125799 | AP4E1 |
| rs11631696  | 15 | 51256809 | 0.0666933 | AP4E1 |
| rs11632971  | 15 | 51280582 | 0.429712  | AP4E1 |
| rs11633226  | 15 | 51249164 | 0.15655   | AP4E1 |
| rs11635015  | 15 | 51230555 | 0.429712  | AP4E1 |
| rs11635054  | 15 | 51237910 | 0.156749  | AP4E1 |
| rs11635102  | 15 | 51260875 | 0.429712  | AP4E1 |
| rs116369071 | 15 | 51252664 | 0.0125799 | AP4E1 |
| rs116835815 | 15 | 51281201 | 0.0125799 | AP4E1 |
| rs117521174 | 15 | 51287916 | 0.0233626 | AP4E1 |
| rs117687584 | 15 | 51203461 | 0.0129792 | AP4E1 |
| rs11854585  | 15 | 51280729 | 0.196486  | AP4E1 |
| rs11854729  | 15 | 51249128 | 0.141573  | AP4E1 |
| rs11857981  | 15 | 51249074 | 0.141773  | AP4E1 |
| rs12385953  | 15 | 51275569 | 0.0559105 | AP4E1 |
| rs12438343  | 15 | 51244417 | 0.43131   | AP4E1 |
| rs12439323  | 15 | 51262790 | 0.15635   | AP4E1 |
| rs12440387  | 15 | 51258670 | 0.208666  | AP4E1 |
| rs12440745  | 15 | 51239520 | 0.208466  | AP4E1 |
| rs12441714  | 15 | 51241091 | 0.430312  | AP4E1 |
| rs12593342  | 15 | 51264164 | 0.235224  | AP4E1 |
| rs12593765  | 15 | 51247054 | 0.208267  | AP4E1 |
| rs12595034  | 15 | 51271581 | 0.494609  | AP4E1 |
| rs12595526  | 15 | 51225021 | 0.211861  | AP4E1 |
| rs12898208  | 15 | 51272706 | 0.434305  | AP4E1 |
| rs12898530  | 15 | 51272882 | 0.438698  | AP4E1 |
| rs12899397  | 15 | 51206409 | 0.137979  | AP4E1 |
| rs12899459  | 15 | 51276718 | 0.494409  | AP4E1 |

|             |    |          |           |       |
|-------------|----|----------|-----------|-------|
| rs12900973  | 15 | 51209974 | 0.185703  | AP4E1 |
| rs12901608  | 15 | 51264598 | 0.196286  | AP4E1 |
| rs12902894  | 15 | 51243964 | 0.438898  | AP4E1 |
| rs12902899  | 15 | 51243989 | 0.438698  | AP4E1 |
| rs12903317  | 15 | 51243983 | 0.183706  | AP4E1 |
| rs12904125  | 15 | 51231534 | 0.438898  | AP4E1 |
| rs12904382  | 15 | 51291576 | 0.496406  | AP4E1 |
| rs12904989  | 15 | 51262058 | 0.46266   | AP4E1 |
| rs12905455  | 15 | 51277812 | 0.135383  | AP4E1 |
| rs12905611  | 15 | 51231548 | 0.434704  | AP4E1 |
| rs12906866  | 15 | 51287083 | 0.494609  | AP4E1 |
| rs12907367  | 15 | 51265986 | 0.126198  | AP4E1 |
| rs12909839  | 15 | 51284120 | 0.208866  | AP4E1 |
| rs12912295  | 15 | 51212123 | 0.429113  | AP4E1 |
| rs12913094  | 15 | 51219284 | 0.142572  | AP4E1 |
| rs12916407  | 15 | 51234178 | 0.434305  | AP4E1 |
| rs12916845  | 15 | 51228452 | 0.237819  | AP4E1 |
| rs13380277  | 15 | 51248837 | 0.131589  | AP4E1 |
| rs137903865 | 15 | 51269760 | 0.0125799 | AP4E1 |
| rs139035937 | 15 | 51206835 | 0.0585064 | AP4E1 |
| rs139281158 | 15 | 51218800 | 0.0233626 | AP4E1 |
| rs139707160 | 15 | 51278215 | 0.0125799 | AP4E1 |
| rs139917489 | 15 | 51255383 | 0.0535144 | AP4E1 |
| rs139989153 | 15 | 51209734 | 0.0205671 | AP4E1 |
| rs141785683 | 15 | 51258393 | 0.0553115 | AP4E1 |
| rs141910204 | 15 | 51238761 | 0.0589058 | AP4E1 |
| rs142506059 | 15 | 51215077 | 0.15615   | AP4E1 |
| rs142528321 | 15 | 51223622 | 0.0285543 | AP4E1 |
| rs143250665 | 15 | 51218403 | 0.052516  | AP4E1 |
| rs143524830 | 15 | 51256769 | 0.0183706 | AP4E1 |
| rs143866598 | 15 | 51258882 | 0.0125799 | AP4E1 |
| rs144809125 | 15 | 51240399 | 0.208466  | AP4E1 |
| rs145058278 | 15 | 51201520 | 0.0135783 | AP4E1 |
| rs145296063 | 15 | 51244435 | 0.0127796 | AP4E1 |
| rs145911405 | 15 | 51288310 | 0.0105831 | AP4E1 |
| rs146318938 | 15 | 51277546 | 0.0125799 | AP4E1 |
| rs146679123 | 15 | 51211733 | 0.439696  | AP4E1 |
| rs146868403 | 15 | 51288266 | 0.0125799 | AP4E1 |
| rs146954539 | 15 | 51274206 | 0.014377  | AP4E1 |
| rs146978512 | 15 | 51290836 | 0.0233626 | AP4E1 |
| rs147068825 | 15 | 51294163 | 0.0125799 | AP4E1 |
| rs147267734 | 15 | 51211775 | 0.0171725 | AP4E1 |
| rs1472946   | 15 | 51223929 | 0.251997  | AP4E1 |

|             |    |          |           |       |
|-------------|----|----------|-----------|-------|
| rs147753935 | 15 | 51261095 | 0.0567093 | AP4E1 |
| rs147818316 | 15 | 51274112 | 0.0561102 | AP4E1 |
| rs147941678 | 15 | 51271336 | 0.0125799 | AP4E1 |
| rs148016613 | 15 | 51202337 | 0.0285543 | AP4E1 |
| rs148658731 | 15 | 51212244 | 0.0239617 | AP4E1 |
| rs149196095 | 15 | 51217097 | 0.0145767 | AP4E1 |
| rs149744437 | 15 | 51279414 | 0.0561102 | AP4E1 |
| rs149905807 | 15 | 51215735 | 0.0263578 | AP4E1 |
| rs150353948 | 15 | 51206110 | 0.0189696 | AP4E1 |
| rs150387952 | 15 | 51266111 | 0.0119808 | AP4E1 |
| rs1509423   | 15 | 51208948 | 0.429113  | AP4E1 |
| rs151038563 | 15 | 51205020 | 0.0125799 | AP4E1 |
| rs16953045  | 15 | 51251122 | 0.141573  | AP4E1 |
| rs16963977  | 15 | 51203171 | 0.15635   | AP4E1 |
| rs16963979  | 15 | 51211916 | 0.0207668 | AP4E1 |
| rs16963982  | 15 | 51213877 | 0.129792  | AP4E1 |
| rs16963985  | 15 | 51218262 | 0.130192  | AP4E1 |
| rs16963993  | 15 | 51250448 | 0.0591054 | AP4E1 |
| rs16963995  | 15 | 51269382 | 0.0465256 | AP4E1 |
| rs17521440  | 15 | 51210563 | 0.0656949 | AP4E1 |
| rs17521467  | 15 | 51214926 | 0.138179  | AP4E1 |
| rs17521789  | 15 | 51271177 | 0.137181  | AP4E1 |
| rs17521919  | 15 | 51291056 | 0.13778   | AP4E1 |
| rs17599863  | 15 | 51219962 | 0.127396  | AP4E1 |
| rs17599974  | 15 | 51237349 | 0.137181  | AP4E1 |
| rs17600241  | 15 | 51287055 | 0.0463259 | AP4E1 |
| rs17646917  | 15 | 51286126 | 0.208267  | AP4E1 |
| rs17703090  | 15 | 51214723 | 0.2502    | AP4E1 |
| rs183188908 | 15 | 51279138 | 0.0199681 | AP4E1 |
| rs1871460   | 15 | 51235469 | 0.208267  | AP4E1 |
| rs1876784   | 15 | 51238955 | 0.208267  | AP4E1 |
| rs188205301 | 15 | 51269390 | 0.0551118 | AP4E1 |
| rs189525744 | 15 | 51223757 | 0.0129792 | AP4E1 |
| rs1904430   | 15 | 51255019 | 0.208466  | AP4E1 |
| rs1904432   | 15 | 51249851 | 0.141573  | AP4E1 |
| rs191297716 | 15 | 51211660 | 0.0101837 | AP4E1 |
| rs191317323 | 15 | 51278833 | 0.0125799 | AP4E1 |
| rs192508958 | 15 | 51238757 | 0.0153754 | AP4E1 |
| rs1955      | 15 | 51238095 | 0.208267  | AP4E1 |
| rs200052940 | 15 | 51204855 | 0.43111   | AP4E1 |
| rs200942832 | 15 | 51204562 | 0.0131789 | AP4E1 |
| rs201298969 | 15 | 51278389 | 0.0491214 | AP4E1 |
| rs201661330 | 15 | 51291901 | 0.0309505 | AP4E1 |

|            |    |          |          |       |
|------------|----|----------|----------|-------|
| rs2127366  | 15 | 51251312 | 0.494609 | AP4E1 |
| rs2127367  | 15 | 51251349 | 0.438698 | AP4E1 |
| rs2127368  | 15 | 51251439 | 0.438698 | AP4E1 |
| rs2170011  | 15 | 51252652 | 0.438698 | AP4E1 |
| rs2289304  | 15 | 51289395 | 0.210863 | AP4E1 |
| rs2291107  | 15 | 51233812 | 0.208267 | AP4E1 |
| rs2306331  | 15 | 51217361 | 0.440895 | AP4E1 |
| rs2306332  | 15 | 51217475 | 0.429113 | AP4E1 |
| rs2306333  | 15 | 51217674 | 0.13758  | AP4E1 |
| rs2306335  | 15 | 51276128 | 0.267572 | AP4E1 |
| rs2414078  | 15 | 51220390 | 0.440895 | AP4E1 |
| rs2414079  | 15 | 51239091 | 0.438698 | AP4E1 |
| rs2414080  | 15 | 51239165 | 0.435503 | AP4E1 |
| rs2414081  | 15 | 51262308 | 0.438898 | AP4E1 |
| rs2614789  | 15 | 51201357 | 0.436302 | AP4E1 |
| rs2614790  | 15 | 51207205 | 0.497005 | AP4E1 |
| rs2614791  | 15 | 51207267 | 0.251997 | AP4E1 |
| rs2614792  | 15 | 51209571 | 0.436901 | AP4E1 |
| rs2614793  | 15 | 51209674 | 0.181709 | AP4E1 |
| rs2614794  | 15 | 51209855 | 0.496605 | AP4E1 |
| rs2619684  | 15 | 51288792 | 0.157748 | AP4E1 |
| rs2619685  | 15 | 51296015 | 0.15655  | AP4E1 |
| rs2619694  | 15 | 51202883 | 0.440895 | AP4E1 |
| rs2663531  | 15 | 51204749 | 0.208466 | AP4E1 |
| rs2663553  | 15 | 51207818 | 0.436701 | AP4E1 |
| rs2663554  | 15 | 51209585 | 0.436502 | AP4E1 |
| rs2663555  | 15 | 51210186 | 0.496605 | AP4E1 |
| rs2663557  | 15 | 51213624 | 0.208466 | AP4E1 |
| rs28366661 | 15 | 51258315 | 0.144569 | AP4E1 |
| rs28430533 | 15 | 51256012 | 0.142772 | AP4E1 |
| rs28552599 | 15 | 51225768 | 0.130391 | AP4E1 |
| rs28642856 | 15 | 51245680 | 0.141573 | AP4E1 |
| rs28702388 | 15 | 51215204 | 0.440895 | AP4E1 |
| rs28885693 | 15 | 51278413 | 0.49401  | AP4E1 |
| rs3214932  | 15 | 51204395 | 0.436302 | AP4E1 |
| rs33961860 | 15 | 51236784 | 0.467652 | AP4E1 |
| rs33980264 | 15 | 51217830 | 0.279952 | AP4E1 |
| rs34048744 | 15 | 51288353 | 0.375998 | AP4E1 |
| rs34511684 | 15 | 51217994 | 0.488019 | AP4E1 |
| rs34632792 | 15 | 51268295 | 0.196685 | AP4E1 |
| rs34688465 | 15 | 51203864 | 0.441094 | AP4E1 |
| rs34797700 | 15 | 51244963 | 0.429712 | AP4E1 |
| rs34930404 | 15 | 51213314 | 0.284944 | AP4E1 |

|             |    |          |           |       |
|-------------|----|----------|-----------|-------|
| rs34970800  | 15 | 51252686 | 0.438698  | AP4E1 |
| rs34974283  | 15 | 51280601 | 0.0289537 | AP4E1 |
| rs35080270  | 15 | 51274891 | 0.183706  | AP4E1 |
| rs35206636  | 15 | 51252202 | 0.208866  | AP4E1 |
| rs35337534  | 15 | 51246415 | 0.234824  | AP4E1 |
| rs35573737  | 15 | 51216820 | 0.208466  | AP4E1 |
| rs35644989  | 15 | 51267750 | 0.183307  | AP4E1 |
| rs35684604  | 15 | 51280334 | 0.196486  | AP4E1 |
| rs36004063  | 15 | 51230834 | 0.208267  | AP4E1 |
| rs3743045   | 15 | 51294995 | 0.490216  | AP4E1 |
| rs376137320 | 15 | 51276108 | 0.0111821 | AP4E1 |
| rs3784301   | 15 | 51225825 | 0.466653  | AP4E1 |
| rs3784302   | 15 | 51226099 | 0.483626  | AP4E1 |
| rs3784303   | 15 | 51237857 | 0.438698  | AP4E1 |
| rs3784304   | 15 | 51238060 | 0.208267  | AP4E1 |
| rs3816717   | 15 | 51204133 | 0.198283  | AP4E1 |
| rs3825797   | 15 | 51225683 | 0.211262  | AP4E1 |
| rs3825798   | 15 | 51294832 | 0.204073  | AP4E1 |
| rs3825799   | 15 | 51295934 | 0.267971  | AP4E1 |
| rs3840015   | 15 | 51293165 | 0.434105  | AP4E1 |
| rs4438254   | 15 | 51264126 | 0.434505  | AP4E1 |
| rs4444282   | 15 | 51215247 | 0.428914  | AP4E1 |
| rs4534781   | 15 | 51267361 | 0.494409  | AP4E1 |
| rs4775910   | 15 | 51215664 | 0.252196  | AP4E1 |
| rs4775912   | 15 | 51280979 | 0.171326  | AP4E1 |
| rs536958160 | 15 | 51203677 | 0.384784  | AP4E1 |
| rs537530114 | 15 | 51206848 | 0.257188  | AP4E1 |
| rs540468993 | 15 | 51241610 | 0.0391374 | AP4E1 |
| rs547069407 | 15 | 51225770 | 0.0151757 | AP4E1 |
| rs551604377 | 15 | 51212613 | 0.256989  | AP4E1 |
| rs554617632 | 15 | 51239613 | 0.386382  | AP4E1 |
| rs556767440 | 15 | 51277180 | 0.0205671 | AP4E1 |
| rs55683982  | 15 | 51238984 | 0.0199681 | AP4E1 |
| rs55735813  | 15 | 51263831 | 0.0207668 | AP4E1 |
| rs55742119  | 15 | 51293644 | 0.0183706 | AP4E1 |
| rs55912100  | 15 | 51297053 | 0.0189696 | AP4E1 |
| rs55920356  | 15 | 51219137 | 0.0199681 | AP4E1 |
| rs55940433  | 15 | 51219242 | 0.0205671 | AP4E1 |
| rs55973448  | 15 | 51264253 | 0.0205671 | AP4E1 |
| rs56010315  | 15 | 51286093 | 0.0205671 | AP4E1 |
| rs56017509  | 15 | 51232202 | 0.0205671 | AP4E1 |
| rs56049414  | 15 | 51261970 | 0.0207668 | AP4E1 |
| rs56056949  | 15 | 51218404 | 0.0205671 | AP4E1 |

|             |    |          |           |       |
|-------------|----|----------|-----------|-------|
| rs56115825  | 15 | 51254215 | 0.160543  | AP4E1 |
| rs56121717  | 15 | 51242625 | 0.0205671 | AP4E1 |
| rs56222335  | 15 | 51274337 | 0.0205671 | AP4E1 |
| rs56273151  | 15 | 51264660 | 0.0205671 | AP4E1 |
| rs56813592  | 15 | 51291261 | 0.0189696 | AP4E1 |
| rs57221782  | 15 | 51287869 | 0.0207668 | AP4E1 |
| rs573092617 | 15 | 51214980 | 0.208866  | AP4E1 |
| rs573632589 | 15 | 51212308 | 0.166334  | AP4E1 |
| rs57499524  | 15 | 51227252 | 0.0205671 | AP4E1 |
| rs57603576  | 15 | 51283566 | 0.131589  | AP4E1 |
| rs58137325  | 15 | 51214383 | 0.208666  | AP4E1 |
| rs58355375  | 15 | 51255874 | 0.0465256 | AP4E1 |
| rs58661036  | 15 | 51201780 | 0.138778  | AP4E1 |
| rs58909326  | 15 | 51233881 | 0.014377  | AP4E1 |
| rs59364110  | 15 | 51272645 | 0.0199681 | AP4E1 |
| rs59798270  | 15 | 51225775 | 0.0964457 | AP4E1 |
| rs60037205  | 15 | 51241772 | 0.0205671 | AP4E1 |
| rs60253924  | 15 | 51272240 | 0.0205671 | AP4E1 |
| rs61011194  | 15 | 51261710 | 0.430711  | AP4E1 |
| rs61161776  | 15 | 51284160 | 0.351637  | AP4E1 |
| rs61378471  | 15 | 51243262 | 0.0205671 | AP4E1 |
| rs61624224  | 15 | 51261049 | 0.438698  | AP4E1 |
| rs62018161  | 15 | 51248317 | 0.066893  | AP4E1 |
| rs62018162  | 15 | 51249246 | 0.131989  | AP4E1 |
| rs62018163  | 15 | 51249897 | 0.131589  | AP4E1 |
| rs62018164  | 15 | 51267277 | 0.066893  | AP4E1 |
| rs62018166  | 15 | 51273683 | 0.131589  | AP4E1 |
| rs6493467   | 15 | 51207143 | 0.0207668 | AP4E1 |
| rs6493468   | 15 | 51224642 | 0.0125799 | AP4E1 |
| rs6493469   | 15 | 51224896 | 0.440895  | AP4E1 |
| rs6493470   | 15 | 51284680 | 0.196486  | AP4E1 |
| rs66467957  | 15 | 51240537 | 0.416534  | AP4E1 |
| rs67889301  | 15 | 51266039 | 0.208666  | AP4E1 |
| rs71426056  | 15 | 51263125 | 0.137181  | AP4E1 |
| rs71471583  | 15 | 51213277 | 0.185903  | AP4E1 |
| rs71471584  | 15 | 51261229 | 0.137181  | AP4E1 |
| rs71471585  | 15 | 51262700 | 0.137181  | AP4E1 |
| rs71471587  | 15 | 51281623 | 0.13738   | AP4E1 |
| rs714784    | 15 | 51296407 | 0.433107  | AP4E1 |
| rs7161775   | 15 | 51247111 | 0.014377  | AP4E1 |
| rs7162209   | 15 | 51238175 | 0.429712  | AP4E1 |
| rs7162562   | 15 | 51294497 | 0.259784  | AP4E1 |
| rs7165920   | 15 | 51229808 | 0.137181  | AP4E1 |

|            |    |          |           |       |
|------------|----|----------|-----------|-------|
| rs7166073  | 15 | 51268452 | 0.072484  | AP4E1 |
| rs7168385  | 15 | 51248142 | 0.438698  | AP4E1 |
| rs7168846  | 15 | 51248194 | 0.438698  | AP4E1 |
| rs7169746  | 15 | 51295933 | 0.0125799 | AP4E1 |
| rs7169888  | 15 | 51257217 | 0.494609  | AP4E1 |
| rs7170036  | 15 | 51248303 | 0.29393   | AP4E1 |
| rs7170302  | 15 | 51211110 | 0.201478  | AP4E1 |
| rs7170310  | 15 | 51211131 | 0.211661  | AP4E1 |
| rs7170311  | 15 | 51211133 | 0.429113  | AP4E1 |
| rs7170365  | 15 | 51274505 | 0.434305  | AP4E1 |
| rs7170675  | 15 | 51274547 | 0.438698  | AP4E1 |
| rs7171085  | 15 | 51257312 | 0.438698  | AP4E1 |
| rs7173930  | 15 | 51233144 | 0.014377  | AP4E1 |
| rs7174066  | 15 | 51204716 | 0.0263578 | AP4E1 |
| rs7175024  | 15 | 51257790 | 0.141573  | AP4E1 |
| rs7176496  | 15 | 51236837 | 0.234625  | AP4E1 |
| rs7176498  | 15 | 51236838 | 0.208267  | AP4E1 |
| rs7176764  | 15 | 51257967 | 0.0125799 | AP4E1 |
| rs7177267  | 15 | 51258193 | 0.438898  | AP4E1 |
| rs7178380  | 15 | 51237171 | 0.0151757 | AP4E1 |
| rs7179321  | 15 | 51225126 | 0.138179  | AP4E1 |
| rs7179527  | 15 | 51202066 | 0.0151757 | AP4E1 |
| rs7180258  | 15 | 51285127 | 0.433706  | AP4E1 |
| rs7181051  | 15 | 51273094 | 0.438299  | AP4E1 |
| rs7181081  | 15 | 51258661 | 0.196286  | AP4E1 |
| rs7181201  | 15 | 51288651 | 0.42492   | AP4E1 |
| rs7182957  | 15 | 51282371 | 0.434305  | AP4E1 |
| rs7184026  | 15 | 51290796 | 0.434105  | AP4E1 |
| rs72742383 | 15 | 51201281 | 0.111022  | AP4E1 |
| rs72742385 | 15 | 51201695 | 0.0129792 | AP4E1 |
| rs74013114 | 15 | 51257318 | 0.0263578 | AP4E1 |
| rs74013115 | 15 | 51265893 | 0.0207668 | AP4E1 |
| rs74015232 | 15 | 51201637 | 0.0263578 | AP4E1 |
| rs74015235 | 15 | 51222871 | 0.0205671 | AP4E1 |
| rs74015236 | 15 | 51227473 | 0.0205671 | AP4E1 |
| rs74015237 | 15 | 51238351 | 0.0101837 | AP4E1 |
| rs74425710 | 15 | 51294201 | 0.0189696 | AP4E1 |
| rs74456643 | 15 | 51251169 | 0.18131   | AP4E1 |
| rs74542754 | 15 | 51284206 | 0.0551118 | AP4E1 |
| rs74595855 | 15 | 51263496 | 0.0125799 | AP4E1 |
| rs74691644 | 15 | 51265239 | 0.0551118 | AP4E1 |
| rs74692397 | 15 | 51281231 | 0.0233626 | AP4E1 |
| rs7494977  | 15 | 51264464 | 0.438898  | AP4E1 |



|            |    |          |           |       |
|------------|----|----------|-----------|-------|
| rs75104984 | 15 | 51295732 | 0.0131789 | AP4E1 |
| rs75130619 | 15 | 51289605 | 0.0125799 | AP4E1 |
| rs75185654 | 15 | 51237719 | 0.0129792 | AP4E1 |
| rs75186798 | 15 | 51268167 | 0.0101837 | AP4E1 |
| rs75202366 | 15 | 51252096 | 0.0559105 | AP4E1 |
| rs75325666 | 15 | 51254769 | 0.0205671 | AP4E1 |
| rs75373532 | 15 | 51239691 | 0.0125799 | AP4E1 |
| rs75537325 | 15 | 51208845 | 0.0285543 | AP4E1 |
| rs75730813 | 15 | 51290184 | 0.0119808 | AP4E1 |
| rs75747330 | 15 | 51221601 | 0.0277556 | AP4E1 |
| rs75813361 | 15 | 51208734 | 0.0121805 | AP4E1 |
| rs75831017 | 15 | 51217013 | 0.0113818 | AP4E1 |
| rs76135475 | 15 | 51225416 | 0.0473243 | AP4E1 |
| rs76141216 | 15 | 51256042 | 0.0553115 | AP4E1 |
| rs76181975 | 15 | 51213359 | 0.0161741 | AP4E1 |
| rs76214747 | 15 | 51256116 | 0.0141773 | AP4E1 |
| rs76253543 | 15 | 51236352 | 0.0559105 | AP4E1 |
| rs76333622 | 15 | 51241911 | 0.0225639 | AP4E1 |
| rs76348913 | 15 | 51253419 | 0.0277556 | AP4E1 |
| rs76364142 | 15 | 51275050 | 0.0559105 | AP4E1 |
| rs76405984 | 15 | 51254073 | 0.0277556 | AP4E1 |
| rs76414278 | 15 | 51267137 | 0.0115815 | AP4E1 |
| rs76674534 | 15 | 51201158 | 0.15655   | AP4E1 |
| rs76765882 | 15 | 51273719 | 0.0219649 | AP4E1 |
| rs76788510 | 15 | 51209639 | 0.052516  | AP4E1 |
| rs76952412 | 15 | 51296962 | 0.0557109 | AP4E1 |
| rs77142919 | 15 | 51230965 | 0.048123  | AP4E1 |
| rs77195953 | 15 | 51253306 | 0.0233626 | AP4E1 |
| rs77298379 | 15 | 51208808 | 0.047524  | AP4E1 |
| rs77485085 | 15 | 51277075 | 0.438099  | AP4E1 |
| rs77518339 | 15 | 51296418 | 0.0225639 | AP4E1 |
| rs77678710 | 15 | 51209268 | 0.047524  | AP4E1 |
| rs77827498 | 15 | 51257204 | 0.0289537 | AP4E1 |
| rs77830403 | 15 | 51255752 | 0.0199681 | AP4E1 |
| rs77971635 | 15 | 51273406 | 0.014976  | AP4E1 |
| rs78013523 | 15 | 51209093 | 0.047524  | AP4E1 |
| rs78059092 | 15 | 51282093 | 0.0147764 | AP4E1 |
| rs78291760 | 15 | 51221723 | 0.0239617 | AP4E1 |
| rs78661200 | 15 | 51231613 | 0.0203674 | AP4E1 |
| rs78869745 | 15 | 51263909 | 0.0551118 | AP4E1 |
| rs78874076 | 15 | 51208748 | 0.0145767 | AP4E1 |
| rs79233022 | 15 | 51225757 | 0.048123  | AP4E1 |
| rs79342740 | 15 | 51282875 | 0.0377396 | AP4E1 |

|             |    |          |           |       |
|-------------|----|----------|-----------|-------|
| rs79490108  | 15 | 51255026 | 0.0375399 | AP4E1 |
| rs79502022  | 15 | 51226482 | 0.0159744 | AP4E1 |
| rs79673051  | 15 | 51209370 | 0.0125799 | AP4E1 |
| rs79769282  | 15 | 51255392 | 0.0205671 | AP4E1 |
| rs79921673  | 15 | 51244295 | 0.0553115 | AP4E1 |
| rs79933276  | 15 | 51220427 | 0.0579073 | AP4E1 |
| rs79942028  | 15 | 51259346 | 0.0125799 | AP4E1 |
| rs80021522  | 15 | 51272673 | 0.0553115 | AP4E1 |
| rs80143414  | 15 | 51252354 | 0.0465256 | AP4E1 |
| rs8024428   | 15 | 51247037 | 0.438898  | AP4E1 |
| rs8026361   | 15 | 51222492 | 0.485623  | AP4E1 |
| rs8026520   | 15 | 51222491 | 0.485623  | AP4E1 |
| rs8029155   | 15 | 51240700 | 0.43111   | AP4E1 |
| rs8029369   | 15 | 51256512 | 0.438698  | AP4E1 |
| rs8029899   | 15 | 51271229 | 0.0125799 | AP4E1 |
| rs8030214   | 15 | 51232326 | 0.429712  | AP4E1 |
| rs8031702   | 15 | 51236304 | 0.494609  | AP4E1 |
| rs8032236   | 15 | 51223449 | 0.138379  | AP4E1 |
| rs8034236   | 15 | 51271578 | 0.328075  | AP4E1 |
| rs8034576   | 15 | 51271808 | 0.434305  | AP4E1 |
| rs8034812   | 15 | 51262773 | 0.196286  | AP4E1 |
| rs8035358   | 15 | 51219293 | 0.428914  | AP4E1 |
| rs8036604   | 15 | 51220989 | 0.198482  | AP4E1 |
| rs8037730   | 15 | 51209058 | 0.014377  | AP4E1 |
| rs8041824   | 15 | 51229177 | 0.251997  | AP4E1 |
| rs8182062   | 15 | 51254502 | 0.29393   | AP4E1 |
| rs936482    | 15 | 51210641 | 0.211661  | AP4E1 |
| rs9944192   | 15 | 51234595 | 0.131589  | AP4E1 |
| rs1050542   | 7  | 99704827 | 0.39397   | AP4M1 |
| rs111401705 | 7  | 99706579 | 0.0361422 | AP4M1 |
| rs1122598   | 7  | 99699436 | 0.20008   | AP4M1 |
| rs113821198 | 7  | 99706818 | 0.019369  | AP4M1 |
| rs11384843  | 7  | 99700054 | 0.156749  | AP4M1 |
| rs13309     | 7  | 99704796 | 0.364816  | AP4M1 |
| rs138801969 | 7  | 99707208 | 0.0103834 | AP4M1 |
| rs139906290 | 7  | 99701422 | 0.0457268 | AP4M1 |
| rs189367118 | 7  | 99699407 | 0.0115815 | AP4M1 |
| rs2272338   | 7  | 99707712 | 0.342053  | AP4M1 |
| rs2293479   | 7  | 99703958 | 0.303115  | AP4M1 |
| rs2293481   | 7  | 99699626 | 0.345248  | AP4M1 |
| rs3837088   | 7  | 99707267 | 0.188498  | AP4M1 |
| rs41280962  | 7  | 99700274 | 0.0459265 | AP4M1 |
| rs41280968  | 7  | 99702947 | 0.0309505 | AP4M1 |

|             |    |          |           |       |
|-------------|----|----------|-----------|-------|
| rs4134917   | 7  | 99707950 | 0.345048  | AP4M1 |
| rs4134919   | 7  | 99707728 | 0.0341454 | AP4M1 |
| rs4134920   | 7  | 99707682 | 0.033746  | AP4M1 |
| rs4134921   | 7  | 99706550 | 0.0213658 | AP4M1 |
| rs4134922   | 7  | 99706518 | 0.0109824 | AP4M1 |
| rs4134923   | 7  | 99706303 | 0.342053  | AP4M1 |
| rs4134925   | 7  | 99705358 | 0.0433307 | AP4M1 |
| rs4134926   | 7  | 99705347 | 0.0433307 | AP4M1 |
| rs4134927   | 7  | 99705320 | 0.043131  | AP4M1 |
| rs4729577   | 7  | 99701640 | 0.343051  | AP4M1 |
| rs553969369 | 7  | 99706579 | 0.0361422 | AP4M1 |
| rs55764736  | 7  | 99700705 | 0.435104  | AP4M1 |
| rs62485013  | 7  | 99703505 | 0.102037  | AP4M1 |
| rs74961284  | 7  | 99700471 | 0.0205671 | AP4M1 |
| rs79617997  | 7  | 99703669 | 0.0195687 | AP4M1 |
| rs999885    | 7  | 99701176 | 0.462859  | AP4M1 |
| rs999886    | 7  | 99700864 | 0.345847  | AP4M1 |
| rs10130804  | 14 | 31558790 | 0.180911  | AP4S1 |
| rs10143450  | 14 | 31545965 | 0.16853   | AP4S1 |
| rs10149122  | 14 | 31553136 | 0.240815  | AP4S1 |
| rs10483353  | 14 | 31552620 | 0.0944489 | AP4S1 |
| rs10686522  | 14 | 31504602 | 0.378594  | AP4S1 |
| rs111260382 | 14 | 31555589 | 0.0325479 | AP4S1 |
| rs111443723 | 14 | 31508426 | 0.0125799 | AP4S1 |
| rs11156657  | 14 | 31556879 | 0.476837  | AP4S1 |
| rs111721514 | 14 | 31531333 | 0.0636981 | AP4S1 |
| rs111751756 | 14 | 31526946 | 0.0672923 | AP4S1 |
| rs111925674 | 14 | 31542418 | 0.086861  | AP4S1 |
| rs111969642 | 14 | 31543518 | 0.120807  | AP4S1 |
| rs112094589 | 14 | 31536415 | 0.186701  | AP4S1 |
| rs112151257 | 14 | 31559233 | 0.0211661 | AP4S1 |
| rs112174443 | 14 | 31497803 | 0.271166  | AP4S1 |
| rs112222685 | 14 | 31542472 | 0.0147764 | AP4S1 |
| rs112318809 | 14 | 31546357 | 0.0640974 | AP4S1 |
| rs112677610 | 14 | 31542523 | 0.356629  | AP4S1 |
| rs112838601 | 14 | 31537944 | 0.0105831 | AP4S1 |
| rs112934642 | 14 | 31522275 | 0.0115815 | AP4S1 |
| rs112944999 | 14 | 31514699 | 0.0251597 | AP4S1 |
| rs112988345 | 14 | 31551930 | 0.153754  | AP4S1 |
| rs113037823 | 14 | 31545007 | 0.0211661 | AP4S1 |
| rs11318052  | 14 | 31527293 | 0.279952  | AP4S1 |
| rs113217978 | 14 | 31503972 | 0.090655  | AP4S1 |
| rs113522956 | 14 | 31542479 | 0.222244  | AP4S1 |

|             |    |          |           |       |
|-------------|----|----------|-----------|-------|
| rs11362456  | 14 | 31508199 | 0.444289  | AP4S1 |
| rs113946440 | 14 | 31514200 | 0.0794728 | AP4S1 |
| rs113948960 | 14 | 31558233 | 0.0513179 | AP4S1 |
| rs113957062 | 14 | 31542552 | 0.430312  | AP4S1 |
| rs113994339 | 14 | 31525866 | 0.0121805 | AP4S1 |
| rs113998596 | 14 | 31543583 | 0.0277556 | AP4S1 |
| rs114267319 | 14 | 31559838 | 0.0269569 | AP4S1 |
| rs114268603 | 14 | 31526843 | 0.0121805 | AP4S1 |
| rs114633283 | 14 | 31514832 | 0.0121805 | AP4S1 |
| rs11486343  | 14 | 31555163 | 0.0736821 | AP4S1 |
| rs115284632 | 14 | 31538566 | 0.0117812 | AP4S1 |
| rs115366683 | 14 | 31503598 | 0.0165735 | AP4S1 |
| rs115582086 | 14 | 31546121 | 0.0133786 | AP4S1 |
| rs115696722 | 14 | 31503619 | 0.0285543 | AP4S1 |
| rs115699186 | 14 | 31559120 | 0.0147764 | AP4S1 |
| rs115757756 | 14 | 31495774 | 0.0231629 | AP4S1 |
| rs116041583 | 14 | 31498547 | 0.0197684 | AP4S1 |
| rs116167059 | 14 | 31506545 | 0.0121805 | AP4S1 |
| rs11621299  | 14 | 31549745 | 0.149361  | AP4S1 |
| rs11624437  | 14 | 31511743 | 0.121406  | AP4S1 |
| rs11628852  | 14 | 31511351 | 0.121406  | AP4S1 |
| rs11628884  | 14 | 31511376 | 0.133786  | AP4S1 |
| rs116290315 | 14 | 31498231 | 0.0109824 | AP4S1 |
| rs117020487 | 14 | 31495928 | 0.0155751 | AP4S1 |
| rs117642945 | 14 | 31514017 | 0.0171725 | AP4S1 |
| rs117844114 | 14 | 31554729 | 0.0103834 | AP4S1 |
| rs11844541  | 14 | 31558669 | 0.029353  | AP4S1 |
| rs11846285  | 14 | 31510544 | 0.142572  | AP4S1 |
| rs11851696  | 14 | 31557693 | 0.0295527 | AP4S1 |
| rs12148037  | 14 | 31515773 | 0.24361   | AP4S1 |
| rs12432231  | 14 | 31530699 | 0.38099   | AP4S1 |
| rs12435810  | 14 | 31531058 | 0.416134  | AP4S1 |
| rs12435833  | 14 | 31531147 | 0.279752  | AP4S1 |
| rs12879929  | 14 | 31519556 | 0.0309505 | AP4S1 |
| rs12880057  | 14 | 31542675 | 0.436502  | AP4S1 |
| rs12880501  | 14 | 31542691 | 0.382188  | AP4S1 |
| rs12881066  | 14 | 31542503 | 0.184505  | AP4S1 |
| rs12881165  | 14 | 31507179 | 0.0640974 | AP4S1 |
| rs12881224  | 14 | 31542564 | 0.345447  | AP4S1 |
| rs12881677  | 14 | 31521750 | 0.105831  | AP4S1 |
| rs12884130  | 14 | 31525664 | 0.142572  | AP4S1 |
| rs12885160  | 14 | 31513312 | 0.101637  | AP4S1 |
| rs12885886  | 14 | 31522068 | 0.0291534 | AP4S1 |

|             |    |          |           |       |
|-------------|----|----------|-----------|-------|
| rs12886343  | 14 | 31543303 | 0.147564  | AP4S1 |
| rs12892054  | 14 | 31514869 | 0.236422  | AP4S1 |
| rs12892643  | 14 | 31532133 | 0.213458  | AP4S1 |
| rs12892778  | 14 | 31509087 | 0.239217  | AP4S1 |
| rs12892791  | 14 | 31532203 | 0.0638978 | AP4S1 |
| rs12894329  | 14 | 31548538 | 0.232029  | AP4S1 |
| rs12895788  | 14 | 31506349 | 0.240016  | AP4S1 |
| rs12896059  | 14 | 31506411 | 0.239018  | AP4S1 |
| rs12897532  | 14 | 31506582 | 0.239018  | AP4S1 |
| rs12898167  | 14 | 31524499 | 0.105831  | AP4S1 |
| rs138424336 | 14 | 31549107 | 0.417332  | AP4S1 |
| rs138552128 | 14 | 31527962 | 0.01877   | AP4S1 |
| rs138887042 | 14 | 31541939 | 0.0858626 | AP4S1 |
| rs139298611 | 14 | 31501895 | 0.0227636 | AP4S1 |
| rs139418013 | 14 | 31516837 | 0.0121805 | AP4S1 |
| rs139544371 | 14 | 31554870 | 0.0171725 | AP4S1 |
| rs139858412 | 14 | 31525163 | 0.0171725 | AP4S1 |
| rs141148836 | 14 | 31544033 | 0.440096  | AP4S1 |
| rs141324593 | 14 | 31501966 | 0.0199681 | AP4S1 |
| rs141599023 | 14 | 31550278 | 0.0181709 | AP4S1 |
| rs142143742 | 14 | 31543570 | 0.0587061 | AP4S1 |
| rs142244263 | 14 | 31552068 | 0.0315495 | AP4S1 |
| rs144026128 | 14 | 31532452 | 0.120607  | AP4S1 |
| rs144211860 | 14 | 31561764 | 0.0147764 | AP4S1 |
| rs144369957 | 14 | 31511060 | 0.0497204 | AP4S1 |
| rs144674202 | 14 | 31504045 | 0.0109824 | AP4S1 |
| rs144966237 | 14 | 31513843 | 0.0145767 | AP4S1 |
| rs145008020 | 14 | 31528602 | 0.0105831 | AP4S1 |
| rs145231898 | 14 | 31558092 | 0.0101837 | AP4S1 |
| rs145744684 | 14 | 31499282 | 0.0109824 | AP4S1 |
| rs145848124 | 14 | 31501982 | 0.0201677 | AP4S1 |
| rs145948777 | 14 | 31524337 | 0.0131789 | AP4S1 |
| rs145999009 | 14 | 31554806 | 0.0315495 | AP4S1 |
| rs146079119 | 14 | 31504996 | 0.0213658 | AP4S1 |
| rs146945493 | 14 | 31502646 | 0.0139776 | AP4S1 |
| rs147143319 | 14 | 31561754 | 0.0105831 | AP4S1 |
| rs147526198 | 14 | 31516836 | 0.0173722 | AP4S1 |
| rs147678802 | 14 | 31556586 | 0.0119808 | AP4S1 |
| rs148046816 | 14 | 31541480 | 0.0173722 | AP4S1 |
| rs148109049 | 14 | 31509355 | 0.470248  | AP4S1 |
| rs148257458 | 14 | 31507132 | 0.0103834 | AP4S1 |
| rs148489271 | 14 | 31555789 | 0.0315495 | AP4S1 |
| rs148757240 | 14 | 31542526 | 0.0123802 | AP4S1 |

|             |    |          |           |       |
|-------------|----|----------|-----------|-------|
| rs149076690 | 14 | 31542839 | 0.0113818 | AP4S1 |
| rs149164134 | 14 | 31519419 | 0.034345  | AP4S1 |
| rs149226457 | 14 | 31536630 | 0.0365415 | AP4S1 |
| rs149808428 | 14 | 31543571 | 0.0587061 | AP4S1 |
| rs150427275 | 14 | 31520723 | 0.0211661 | AP4S1 |
| rs150629946 | 14 | 31543384 | 0.0151757 | AP4S1 |
| rs150739634 | 14 | 31546836 | 0.0155751 | AP4S1 |
| rs150780772 | 14 | 31558848 | 0.0135783 | AP4S1 |
| rs150827944 | 14 | 31507860 | 0.0141773 | AP4S1 |
| rs151317155 | 14 | 31542562 | 0.175519  | AP4S1 |
| rs17097669  | 14 | 31497243 | 0.280551  | AP4S1 |
| rs17097675  | 14 | 31500759 | 0.28115   | AP4S1 |
| rs17097688  | 14 | 31524435 | 0.130192  | AP4S1 |
| rs17097702  | 14 | 31548342 | 0.0271566 | AP4S1 |
| rs17097708  | 14 | 31551563 | 0.029353  | AP4S1 |
| rs17097714  | 14 | 31555520 | 0.0371406 | AP4S1 |
| rs17097715  | 14 | 31555583 | 0.0303514 | AP4S1 |
| rs17097719  | 14 | 31561096 | 0.0155751 | AP4S1 |
| rs17449560  | 14 | 31529072 | 0.086861  | AP4S1 |
| rs179743    | 14 | 31495625 | 0.449681  | AP4S1 |
| rs179744    | 14 | 31496212 | 0.346246  | AP4S1 |
| rs182923668 | 14 | 31508794 | 0.0185703 | AP4S1 |
| rs183185729 | 14 | 31529149 | 0.0147764 | AP4S1 |
| rs183666073 | 14 | 31505340 | 0.0489217 | AP4S1 |
| rs185410290 | 14 | 31542462 | 0.193091  | AP4S1 |
| rs186589847 | 14 | 31542679 | 0.0209665 | AP4S1 |
| rs187184337 | 14 | 31562077 | 0.029353  | AP4S1 |
| rs187250986 | 14 | 31509046 | 0.0121805 | AP4S1 |
| rs188791012 | 14 | 31542567 | 0.267772  | AP4S1 |
| rs189933613 | 14 | 31542463 | 0.195887  | AP4S1 |
| rs190330158 | 14 | 31542499 | 0.0103834 | AP4S1 |
| rs192362058 | 14 | 31542666 | 0.0209665 | AP4S1 |
| rs200595236 | 14 | 31505348 | 0.0535144 | AP4S1 |
| rs200686742 | 14 | 31555171 | 0.0107827 | AP4S1 |
| rs201254703 | 14 | 31527720 | 0.0636981 | AP4S1 |
| rs2016125   | 14 | 31526854 | 0.384984  | AP4S1 |
| rs201715271 | 14 | 31505337 | 0.0569089 | AP4S1 |
| rs201746644 | 14 | 31510282 | 0.214657  | AP4S1 |
| rs202016594 | 14 | 31552640 | 0.0139776 | AP4S1 |
| rs202188974 | 14 | 31562083 | 0.029353  | AP4S1 |
| rs202224557 | 14 | 31527730 | 0.162141  | AP4S1 |
| rs2064823   | 14 | 31503893 | 0.142372  | AP4S1 |
| rs2180610   | 14 | 31507220 | 0.239018  | AP4S1 |

|             |    |          |           |       |
|-------------|----|----------|-----------|-------|
| rs2281563   | 14 | 31495346 | 0.140375  | AP4S1 |
| rs28446570  | 14 | 31542570 | 0.0820687 | AP4S1 |
| rs28448715  | 14 | 31542492 | 0.209265  | AP4S1 |
| rs28460397  | 14 | 31542633 | 0.0593051 | AP4S1 |
| rs28465500  | 14 | 31542652 | 0.28734   | AP4S1 |
| rs28534387  | 14 | 31518005 | 0.100639  | AP4S1 |
| rs28534627  | 14 | 31542651 | 0.254992  | AP4S1 |
| rs28649794  | 14 | 31542510 | 0.458067  | AP4S1 |
| rs34039100  | 14 | 31561168 | 0.151757  | AP4S1 |
| rs34291198  | 14 | 31506634 | 0.238818  | AP4S1 |
| rs34331763  | 14 | 31496076 | 0.120208  | AP4S1 |
| rs34399663  | 14 | 31515463 | 0.0640974 | AP4S1 |
| rs34527888  | 14 | 31501933 | 0.0457268 | AP4S1 |
| rs34671063  | 14 | 31514598 | 0.236621  | AP4S1 |
| rs34869270  | 14 | 31531521 | 0.0642971 | AP4S1 |
| rs35832522  | 14 | 31530164 | 0.0309505 | AP4S1 |
| rs35941434  | 14 | 31514489 | 0.101637  | AP4S1 |
| rs36025583  | 14 | 31535057 | 0.283946  | AP4S1 |
| rs36036776  | 14 | 31513614 | 0.0309505 | AP4S1 |
| rs368697635 | 14 | 31522284 | 0.0119808 | AP4S1 |
| rs368803353 | 14 | 31552019 | 0.0315495 | AP4S1 |
| rs369287746 | 14 | 31541679 | 0.0121805 | AP4S1 |
| rs373320559 | 14 | 31551994 | 0.0201677 | AP4S1 |
| rs3742920   | 14 | 31495839 | 0.0978435 | AP4S1 |
| rs374680576 | 14 | 31499784 | 0.0109824 | AP4S1 |
| rs375031650 | 14 | 31562067 | 0.029353  | AP4S1 |
| rs375967392 | 14 | 31552026 | 0.0131789 | AP4S1 |
| rs376475493 | 14 | 31552018 | 0.01877   | AP4S1 |
| rs376938112 | 14 | 31553793 | 0.0107827 | AP4S1 |
| rs377481877 | 14 | 31538367 | 0.0119808 | AP4S1 |
| rs377621193 | 14 | 31505118 | 0.0107827 | AP4S1 |
| rs3784156   | 14 | 31500075 | 0.0123802 | AP4S1 |
| rs3784157   | 14 | 31502459 | 0.45008   | AP4S1 |
| rs3784158   | 14 | 31502636 | 0.142772  | AP4S1 |
| rs3784160   | 14 | 31512352 | 0.38758   | AP4S1 |
| rs3784161   | 14 | 31512388 | 0.24381   | AP4S1 |
| rs3784162   | 14 | 31530167 | 0.145767  | AP4S1 |
| rs3784163   | 14 | 31534471 | 0.14377   | AP4S1 |
| rs3784165   | 14 | 31557329 | 0.469649  | AP4S1 |
| rs3825741   | 14 | 31534706 | 0.280351  | AP4S1 |
| rs3954286   | 14 | 31545310 | 0.311102  | AP4S1 |
| rs4981087   | 14 | 31541623 | 0.413538  | AP4S1 |
| rs4981815   | 14 | 31505048 | 0.363818  | AP4S1 |

|             |    |          |           |       |
|-------------|----|----------|-----------|-------|
| rs4981816   | 14 | 31519072 | 0.144968  | AP4S1 |
| rs4981817   | 14 | 31526250 | 0.280351  | AP4S1 |
| rs4981818   | 14 | 31526395 | 0.275359  | AP4S1 |
| rs4981819   | 14 | 31530705 | 0.327077  | AP4S1 |
| rs4981820   | 14 | 31531855 | 0.416334  | AP4S1 |
| rs4981821   | 14 | 31532169 | 0.388978  | AP4S1 |
| rs533095597 | 14 | 31541877 | 0.0367412 | AP4S1 |
| rs534409961 | 14 | 31542569 | 0.0111821 | AP4S1 |
| rs539501124 | 14 | 31542512 | 0.0319489 | AP4S1 |
| rs541593780 | 14 | 31537083 | 0.0916534 | AP4S1 |
| rs549240974 | 14 | 31542559 | 0.0129792 | AP4S1 |
| rs55675143  | 14 | 31513306 | 0.413938  | AP4S1 |
| rs557432648 | 14 | 31544948 | 0.319289  | AP4S1 |
| rs55788541  | 14 | 31514996 | 0.13738   | AP4S1 |
| rs55907561  | 14 | 31522230 | 0.130192  | AP4S1 |
| rs56084170  | 14 | 31541137 | 0.414537  | AP4S1 |
| rs566944113 | 14 | 31542568 | 0.0113818 | AP4S1 |
| rs56698419  | 14 | 31497390 | 0.403355  | AP4S1 |
| rs57129755  | 14 | 31552276 | 0.0465256 | AP4S1 |
| rs57308177  | 14 | 31529138 | 0.0782748 | AP4S1 |
| rs576076187 | 14 | 31542645 | 0.0195687 | AP4S1 |
| rs57704258  | 14 | 31505397 | 0.217252  | AP4S1 |
| rs577226496 | 14 | 31552056 | 0.0113818 | AP4S1 |
| rs57741265  | 14 | 31540751 | 0.41853   | AP4S1 |
| rs577536911 | 14 | 31516052 | 0.076278  | AP4S1 |
| rs577629324 | 14 | 31558370 | 0.344649  | AP4S1 |
| rs58011377  | 14 | 31499548 | 0.189497  | AP4S1 |
| rs58023664  | 14 | 31562072 | 0.0323482 | AP4S1 |
| rs58320021  | 14 | 31546793 | 0.0453275 | AP4S1 |
| rs58491171  | 14 | 31515171 | 0.490615  | AP4S1 |
| rs58771204  | 14 | 31543757 | 0.121605  | AP4S1 |
| rs58939187  | 14 | 31505407 | 0.0125799 | AP4S1 |
| rs59589591  | 14 | 31499777 | 0.0553115 | AP4S1 |
| rs59721419  | 14 | 31494743 | 0.0119808 | AP4S1 |
| rs59788315  | 14 | 31545498 | 0.0209665 | AP4S1 |
| rs60189766  | 14 | 31541129 | 0.211861  | AP4S1 |
| rs61253324  | 14 | 31562102 | 0.0419329 | AP4S1 |
| rs61278505  | 14 | 31505057 | 0.399361  | AP4S1 |
| rs61622691  | 14 | 31528819 | 0.0115815 | AP4S1 |
| rs61976816  | 14 | 31498410 | 0.0597045 | AP4S1 |
| rs61976819  | 14 | 31501903 | 0.0632987 | AP4S1 |
| rs61976820  | 14 | 31505089 | 0.0569089 | AP4S1 |
| rs61976821  | 14 | 31511488 | 0.0786741 | AP4S1 |



|            |    |          |           |       |
|------------|----|----------|-----------|-------|
| rs61976839 | 14 | 31517445 | 0.0642971 | AP4S1 |
| rs61976841 | 14 | 31520576 | 0.0642971 | AP4S1 |
| rs61976849 | 14 | 31529481 | 0.303914  | AP4S1 |
| rs61976854 | 14 | 31542625 | 0.0131789 | AP4S1 |
| rs6571386  | 14 | 31535603 | 0.0549121 | AP4S1 |
| rs6571387  | 14 | 31535756 | 0.141573  | AP4S1 |
| rs6571388  | 14 | 31537338 | 0.276158  | AP4S1 |
| rs6571389  | 14 | 31541494 | 0.268171  | AP4S1 |
| rs6571391  | 14 | 31561890 | 0.322684  | AP4S1 |
| rs67489064 | 14 | 31523583 | 0.0636981 | AP4S1 |
| rs67643008 | 14 | 31504328 | 0.0489217 | AP4S1 |
| rs7141291  | 14 | 31503483 | 0.170327  | AP4S1 |
| rs71417942 | 14 | 31527725 | 0.0427316 | AP4S1 |
| rs71417945 | 14 | 31541136 | 0.066893  | AP4S1 |
| rs71417946 | 14 | 31551775 | 0.121406  | AP4S1 |
| rs7142495  | 14 | 31498056 | 0.047524  | AP4S1 |
| rs7142712  | 14 | 31512731 | 0.0788738 | AP4S1 |
| rs7142931  | 14 | 31503674 | 0.170128  | AP4S1 |
| rs71430917 | 14 | 31562672 | 0.221246  | AP4S1 |
| rs7143488  | 14 | 31498057 | 0.45008   | AP4S1 |
| rs7146243  | 14 | 31525415 | 0.145168  | AP4S1 |
| rs7149411  | 14 | 31499513 | 0.451677  | AP4S1 |
| rs7150103  | 14 | 31508324 | 0.158946  | AP4S1 |
| rs7150310  | 14 | 31508431 | 0.0792732 | AP4S1 |
| rs7150619  | 14 | 31538939 | 0.416933  | AP4S1 |
| rs7150642  | 14 | 31501505 | 0.345847  | AP4S1 |
| rs7153940  | 14 | 31514057 | 0.395367  | AP4S1 |
| rs7155228  | 14 | 31538984 | 0.272963  | AP4S1 |
| rs7156330  | 14 | 31523944 | 0.275359  | AP4S1 |
| rs7157080  | 14 | 31553720 | 0.241813  | AP4S1 |
| rs7159175  | 14 | 31536175 | 0.0547125 | AP4S1 |
| rs7160965  | 14 | 31506505 | 0.148962  | AP4S1 |
| rs71905676 | 14 | 31501278 | 0.497604  | AP4S1 |
| rs72670320 | 14 | 31507159 | 0.121006  | AP4S1 |
| rs72670321 | 14 | 31510337 | 0.387979  | AP4S1 |
| rs72670323 | 14 | 31510879 | 0.133786  | AP4S1 |
| rs72670334 | 14 | 31535996 | 0.130391  | AP4S1 |
| rs73251993 | 14 | 31494909 | 0.0121805 | AP4S1 |
| rs73252171 | 14 | 31538774 | 0.0117812 | AP4S1 |
| rs73252178 | 14 | 31539837 | 0.0117812 | AP4S1 |
| rs73252184 | 14 | 31542426 | 0.0634984 | AP4S1 |
| rs73252194 | 14 | 31543689 | 0.0207668 | AP4S1 |
| rs73252199 | 14 | 31547821 | 0.0211661 | AP4S1 |

|            |    |          |           |       |
|------------|----|----------|-----------|-------|
| rs73252201 | 14 | 31548963 | 0.0642971 | AP4S1 |
| rs73253804 | 14 | 31549619 | 0.0642971 | AP4S1 |
| rs74042126 | 14 | 31546596 | 0.0139776 | AP4S1 |
| rs74042130 | 14 | 31560854 | 0.0417332 | AP4S1 |
| rs74243245 | 14 | 31506616 | 0.013778  | AP4S1 |
| rs74335139 | 14 | 31543796 | 0.013778  | AP4S1 |
| rs74603781 | 14 | 31496032 | 0.0231629 | AP4S1 |
| rs74733659 | 14 | 31532132 | 0.0792732 | AP4S1 |
| rs74742132 | 14 | 31515116 | 0.090655  | AP4S1 |
| rs74877958 | 14 | 31538386 | 0.024361  | AP4S1 |
| rs75270249 | 14 | 31546641 | 0.0139776 | AP4S1 |
| rs75302768 | 14 | 31504344 | 0.0223642 | AP4S1 |
| rs75344069 | 14 | 31518753 | 0.0794728 | AP4S1 |
| rs75563026 | 14 | 31501121 | 0.45028   | AP4S1 |
| rs75790144 | 14 | 31530035 | 0.0121805 | AP4S1 |
| rs75945533 | 14 | 31560568 | 0.0367412 | AP4S1 |
| rs76094753 | 14 | 31556960 | 0.0115815 | AP4S1 |
| rs76102969 | 14 | 31513425 | 0.013778  | AP4S1 |
| rs76919081 | 14 | 31502812 | 0.0123802 | AP4S1 |
| rs76947134 | 14 | 31548451 | 0.0133786 | AP4S1 |
| rs77070160 | 14 | 31553261 | 0.0205671 | AP4S1 |
| rs78221587 | 14 | 31551762 | 0.0189696 | AP4S1 |
| rs78451665 | 14 | 31550594 | 0.0203674 | AP4S1 |
| rs78532456 | 14 | 31519358 | 0.120407  | AP4S1 |
| rs78648016 | 14 | 31494988 | 0.0896565 | AP4S1 |
| rs79020122 | 14 | 31561175 | 0.0579073 | AP4S1 |
| rs79091644 | 14 | 31505778 | 0.013778  | AP4S1 |
| rs79344286 | 14 | 31528118 | 0.0141773 | AP4S1 |
| rs79385270 | 14 | 31531477 | 0.212859  | AP4S1 |
| rs79479260 | 14 | 31505795 | 0.0870607 | AP4S1 |
| rs79479957 | 14 | 31514081 | 0.0119808 | AP4S1 |
| rs79543676 | 14 | 31524935 | 0.147364  | AP4S1 |
| rs79767107 | 14 | 31504769 | 0.160743  | AP4S1 |
| rs79797441 | 14 | 31518967 | 0.190495  | AP4S1 |
| rs8007102  | 14 | 31546021 | 0.033746  | AP4S1 |
| rs8008326  | 14 | 31500403 | 0.0165735 | AP4S1 |
| rs8008526  | 14 | 31500537 | 0.142772  | AP4S1 |
| rs8010129  | 14 | 31513099 | 0.239217  | AP4S1 |
| rs8010967  | 14 | 31499082 | 0.0978435 | AP4S1 |
| rs8011836  | 14 | 31559608 | 0.430312  | AP4S1 |
| rs8012582  | 14 | 31543803 | 0.0810703 | AP4S1 |
| rs8014110  | 14 | 31540760 | 0.136382  | AP4S1 |
| rs8014360  | 14 | 31508785 | 0.255791  | AP4S1 |

|           |    |          |           |       |
|-----------|----|----------|-----------|-------|
| rs8019317 | 14 | 31518416 | 0.0642971 | AP4S1 |
| rs8020210 | 14 | 31518394 | 0.145966  | AP4S1 |
| rs8021054 | 14 | 31520811 | 0.275359  | AP4S1 |
| rs9181    | 14 | 31562424 | 0.0105831 | AP4S1 |
| rs9944096 | 14 | 31560608 | 0.0211661 | AP4S1 |
